# Supplementary material for: 举重若轻 行云流水——听李镇西老师讲课有感
Source: MDPI journal article supplement (doi:10.3390/ph16010072), 2011-01-01

## Supplement Material

### I. Chromatograms of N-Acetylcysteine forced degradation

Figure S1. Heat (80 °C, 3 h)

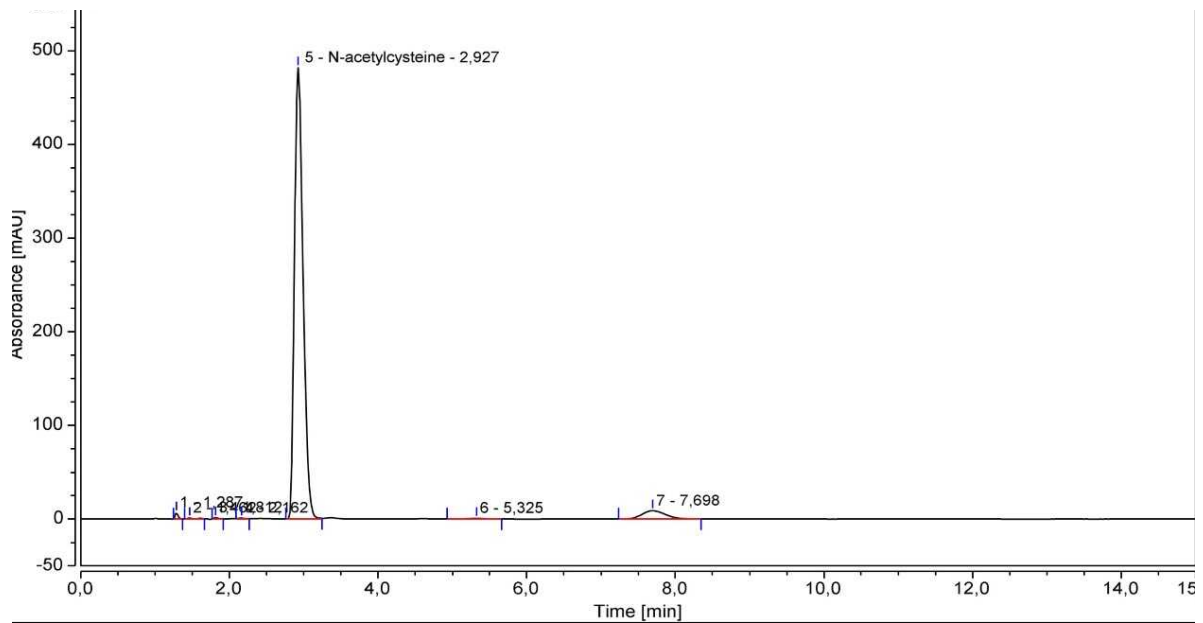

Figure S2. Light (sunlamp, 28 days)

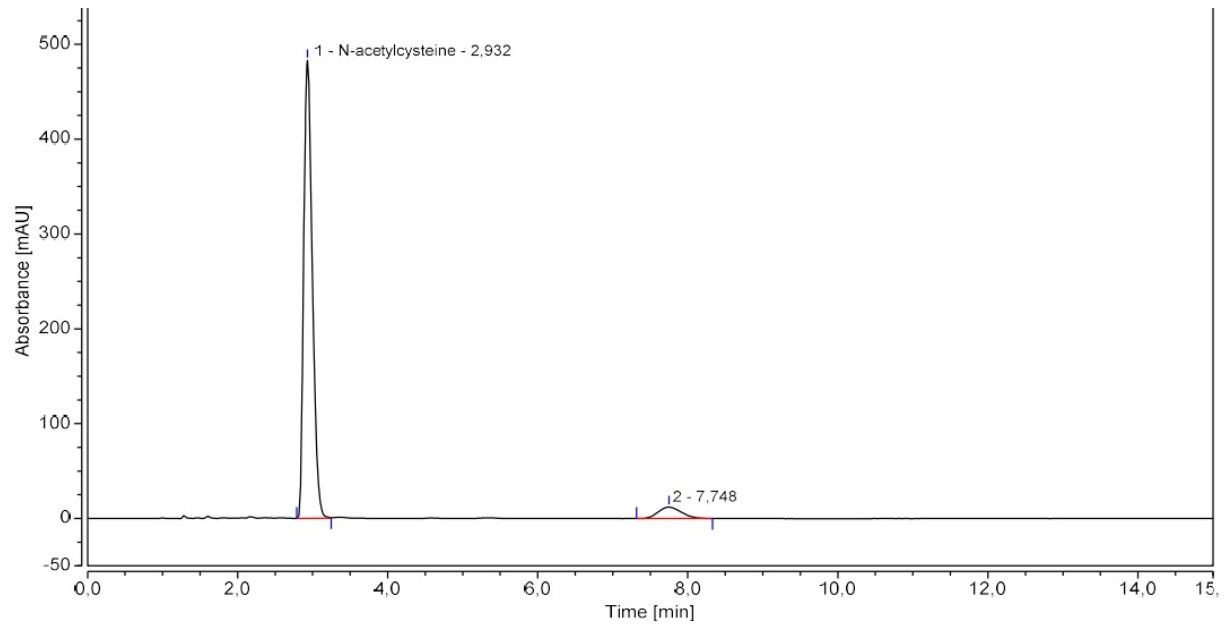

**Figure S3. Oxidation ( $\text{H}_2\text{O}_2$  0.3 %, 3 h)**

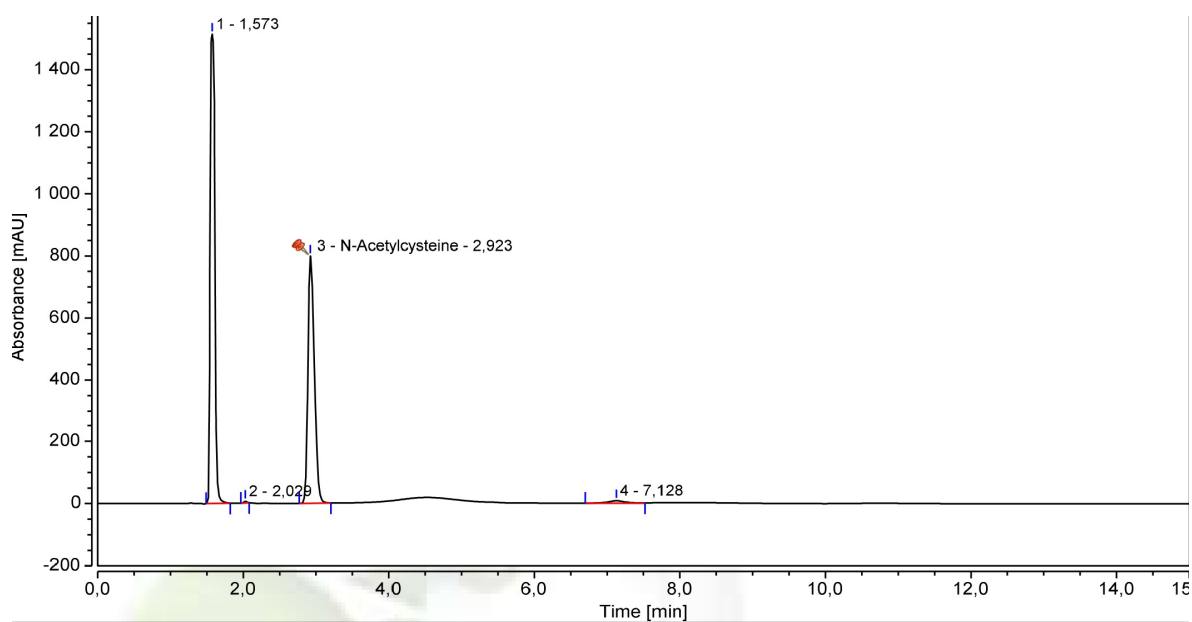

**Figure S4. Acid (HCl 0.5 M, 1 min)**

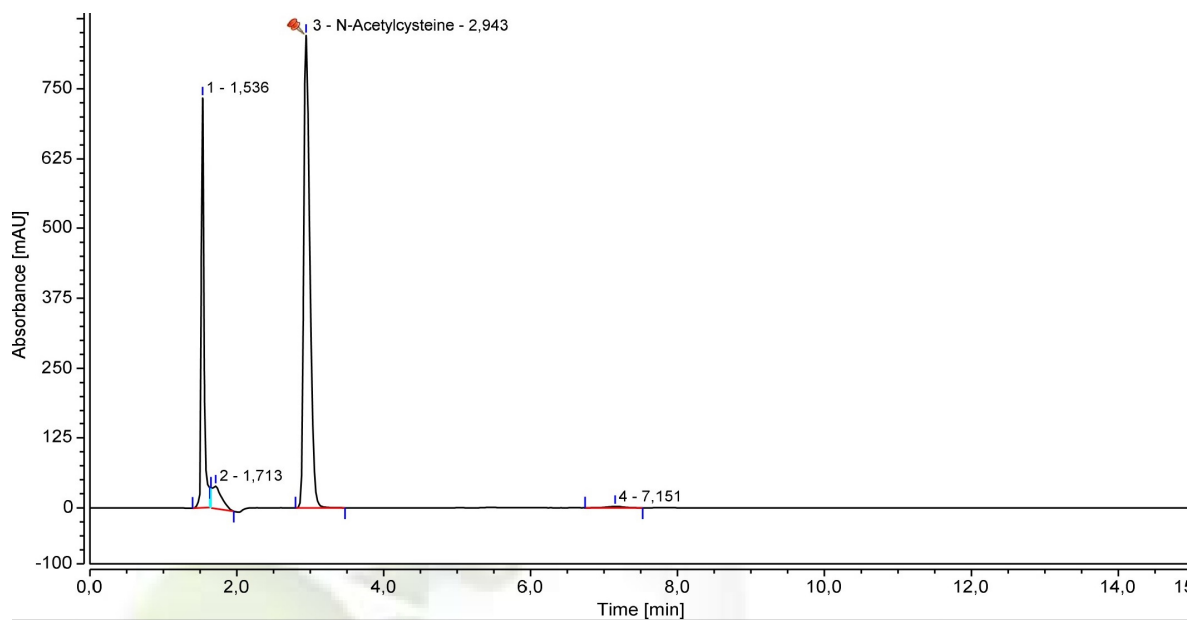

**Figure S5. Alkaline (NaOH 0.1 M, 10 min)**

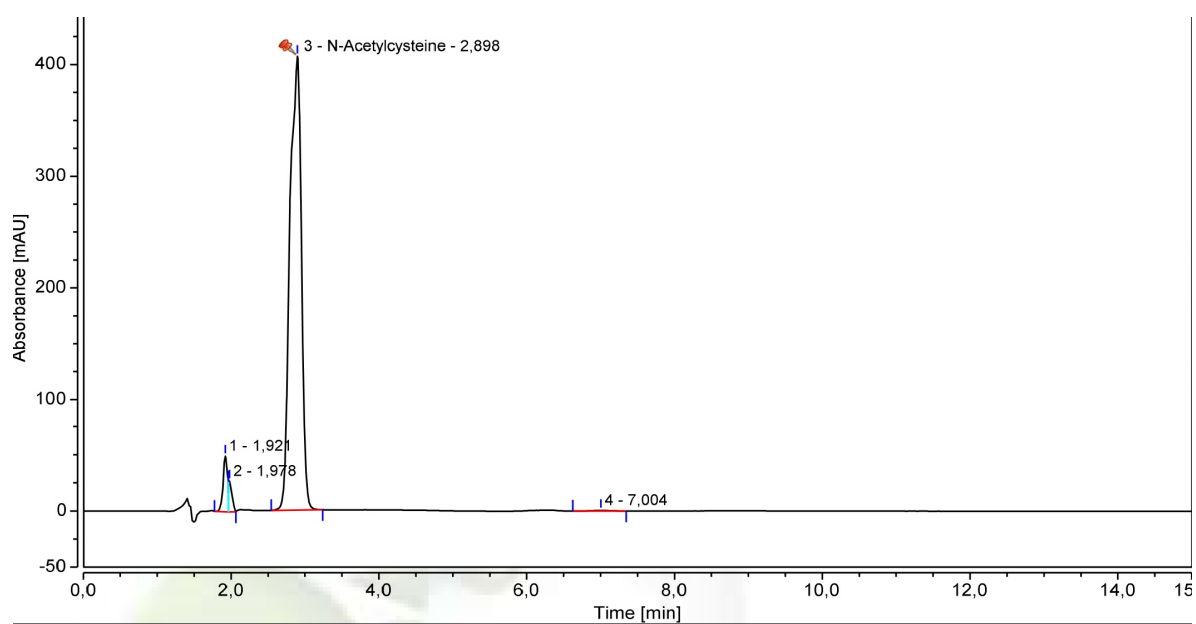

## II. Chromatogram of N-Acetylcysteine dimer

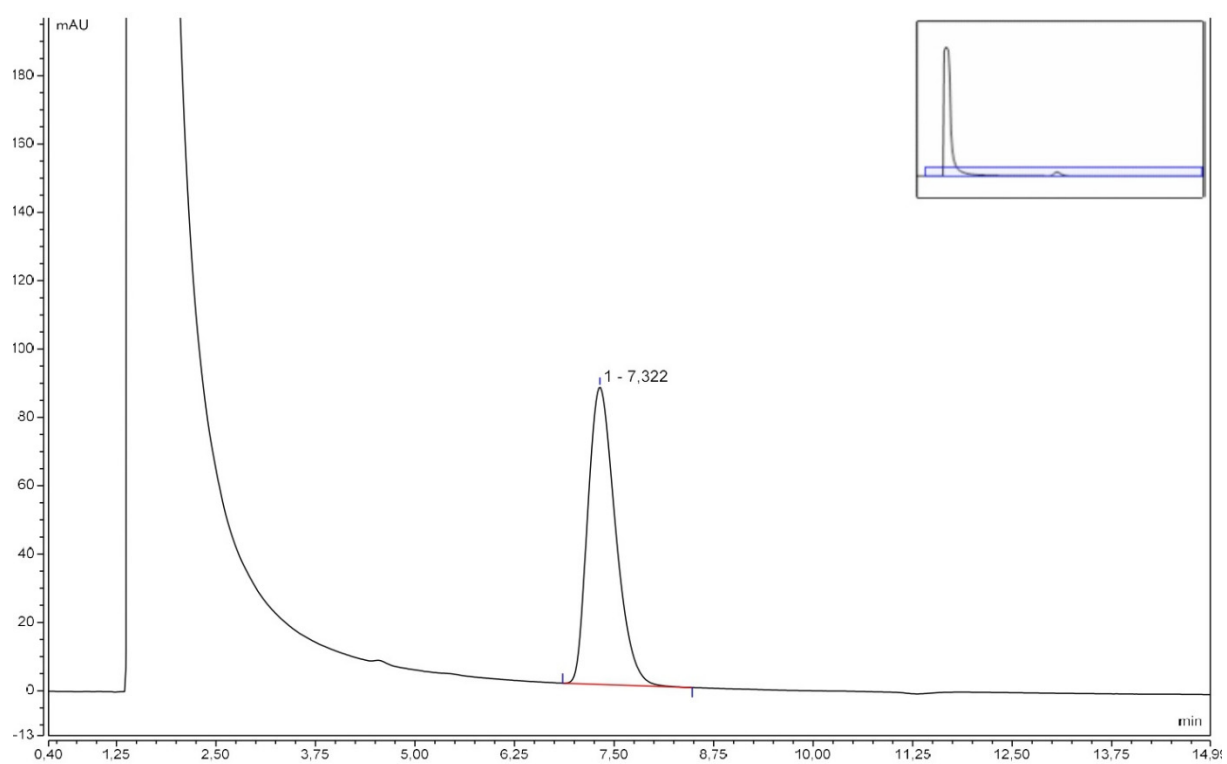

Supplement: s1 [file s1]
